# Supplementary material
Source: Springer Nature journal article supplement (https://www.springermedizin.de/resource/supplementary/13034_2007_18_MOESM1_ESM.pdf/9652184)

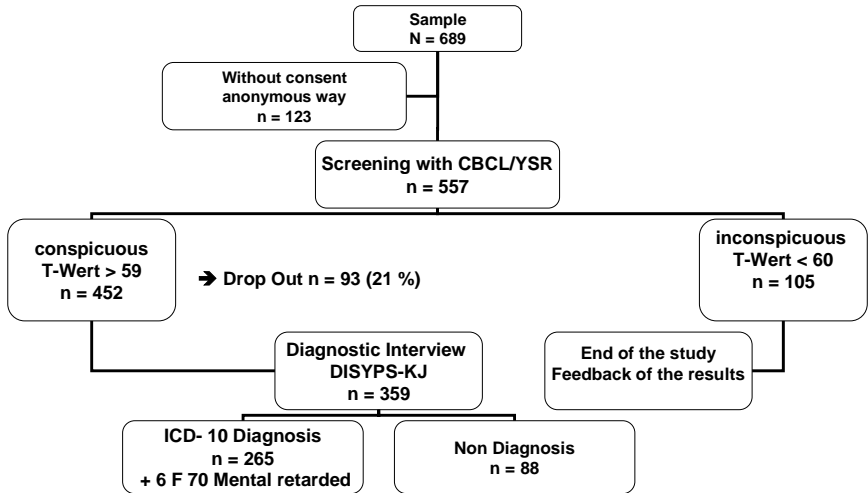

Supplement: MOESM1 [file 9652184]
